# Supplementary material for: Extracellular vesicles in the hematopoietic microenvironment
Source: PubMed Central journal article supplement — Haematologica. 2018 Feb 8;103(3):382–94. doi: 10.3324/haematol.2017.183335 (PMC5830368; doi:10.3324/haematol.2017.183335), 2018-03
Supplement: 2017_183335-Disclosures_and_Contributions.pdf [file 2017_183335-Disclosures_and_Contributions.pdf]

Haematologica  
HAEMATOL/2017/183335  
Version 3

Extracellular vesicles in the hematopoietic microenvironment

John T. Butler, Sherif Abdelhamed, and Peter Kurre

Disclosures: Grant support: Hyundai Hope on Wheels (PK) Max Blue Butterfly Campaign (PK) Medical Research Foundation of Oregon (SA) No other disclosures

Contributions: JB, SA and PK conceived, researched and wrote this review.
