# Supplementary material for: Extracellular vesicles in the hematopoietic microenvironment
Source: PubMed Central journal article supplement — Haematologica. 2018 Feb 8;103(3):382–94. doi: 10.3324/haematol.2017.183335 (PMC5830368; doi:10.3324/haematol.2017.183335), 2018-03

# The role of extracellular vesicles in both homeostatic and pathogenetic niche

## Physiological regulation of hematopoiesis by EVs

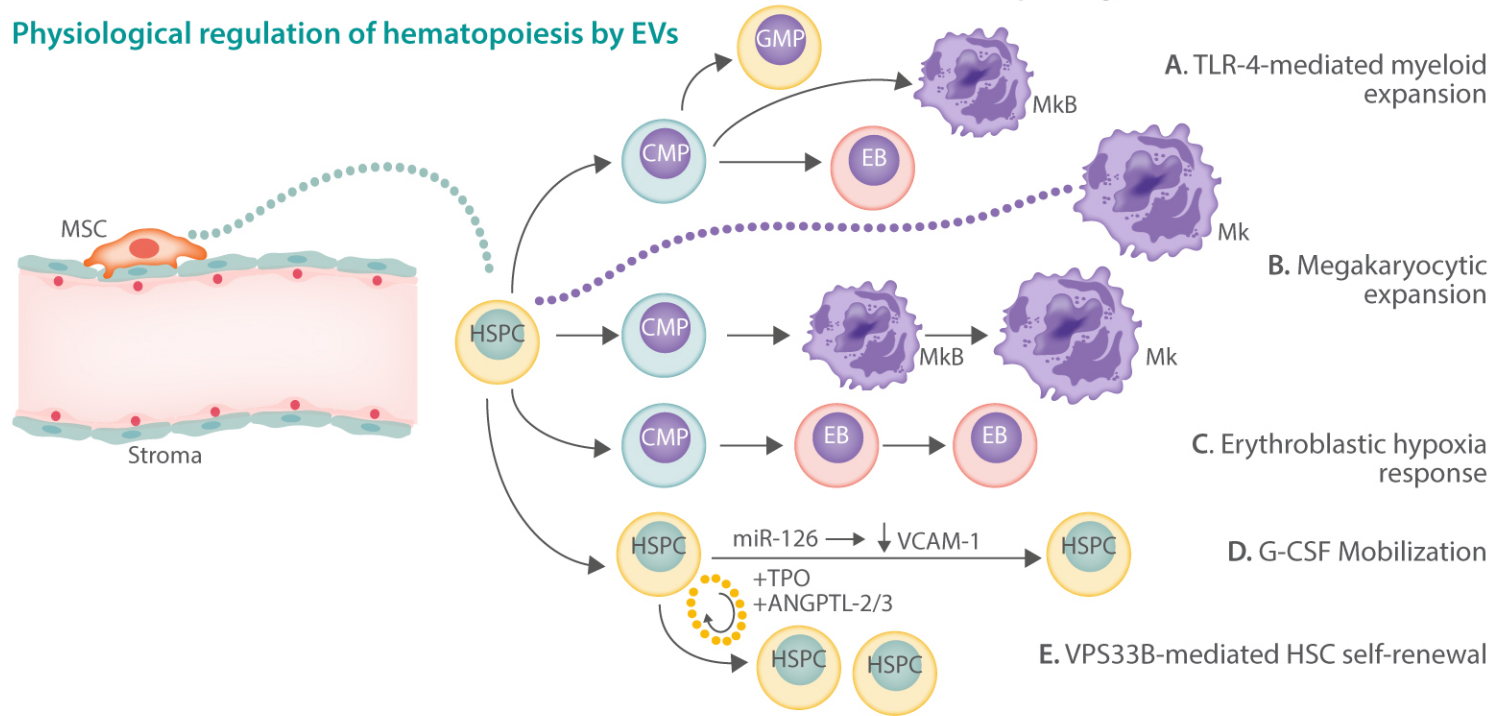

## Pathophysiological regulation of hematopoiesis by EVs

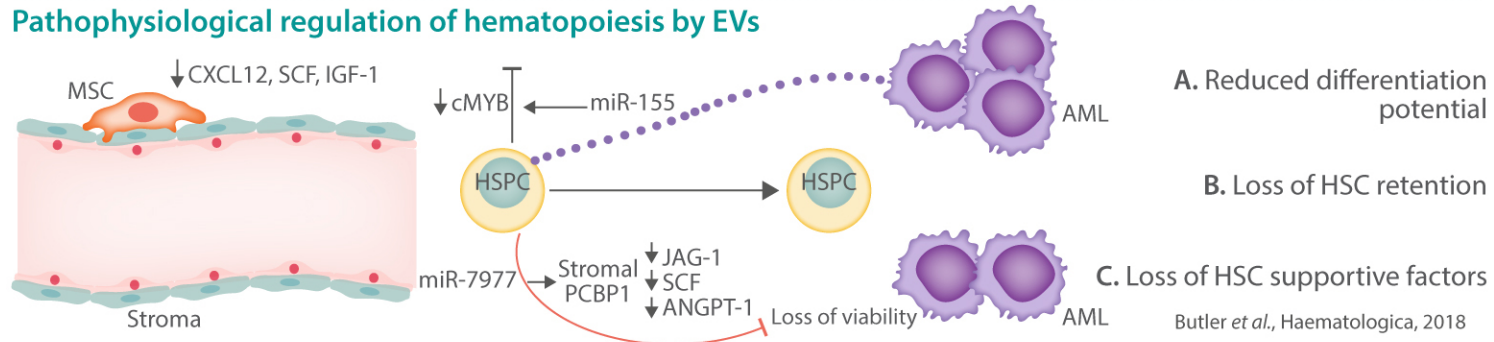

Supplement: HAEMATOL-2017-183335v3-Butler-01.pdf [file HAEMATOL-2017-183335v3-Butler-01.pdf]
